# Supplementary material for: Genetic Polymorphisms, LDL-C and sdLDL-C Help Optimize Coronary Heart Disease (CHD) Therapy
Source: Research Square preprint supplement (doi:10.21203/rs.3.rs-140205/v1), 2021-01-29
Supplement: Supplementary file 1 [file 445c59a29c1efc673eb8ba7a.docx]

**SupplementaryMaterials**

**Geneticpolymorphisms,LDL-CandsdLDL-Chelpoptimize**[**coronaryheartdisease**](javascript:;)**(CHD)therapy**

RuozhuDai1,HuilinZhuo1,WeiWang1,*,injunWang2,4,*andiaoyuZhao2,3,*

1DepartmentofCardiology,QuanzhouFirstHospitalAffiliatedtoFujianMedicalUniversity,China

2ShanghaiBiotecanPharmaceuticalsCo.,Ltd,ShanghaiZhangjiangInstituteofMedicalInnovation,China

3StateKeyLaboratoryofGeneticEngineerings,SchoolofLifeSciences,FudanUniversity,China

4TranslationalMedicalCenterforStemCellTherapyandInstituteforRegenerativeMedicine,ShanghaiEastHospital,ShanghaiKeyLaboratoryofSignalingandDiseaseResearch,SchoolofLifeSciencesandTechnology,TongjiUniversity,Shanghai,China.

**MaterialsandMethods**

*LDL-Cdetection*

BeforeLDL-Cdetection,totalcholesterol,totaltriglycerides,plasmaHDL-C,andplasmaLDL-CwereneededforLDL-Csubfractionauiliaryanalysis.ThesefourbiomarkersweredetectedwithPTSPANELSLipidPanelTestStrips(PTSdiagnostics,No:PTS-1710)andanalyzedbyaCardioChek®PAanalyzer(PTSdiagnostics,USA).LDL-CdetectionwasperformedwithaQuantimetriLipoprintSystemLDLSubfractionKit(Quantimetri,No:REF48-7002)protocol[[1](#_ENREF_1)].Inbrief,thegeltubeswereremovedfromthejarandthenwipedoffandplacedinthepreparationrack.Thestoragebufferwascompletelyremovedfromthetopofthegelsbyshakingtherack.Then,25μLofplasmasamplewasaddedtoeachtube,and200μLofLipoprintloadinggelwasaddedtoeachtube.AstripofParafilmwasplacedbetweenthegeltubesandpreparationrackcovertoavoidcontamination.Theloadinggelwiththesamplewasmiedbyinvertingthepreparationrackseveraltimes.Thepreparationlightwasplacedupright,withthebulbatthetop,andtheloadinggelswerephotopolymerizedfor30minutes.Afterphotopolymerizationwascomplete,eachgeltubewasremovedfromthepreparationrackandcarefullyinsertedintothesiliconeadapteroftheupperchamber.Onehundredmillilitersofelectrolytebuffersolutionwereplacedinthelowerchamber,and200mLofthissolutionwasplacedintheupperchamber.Theelectrophoresischamberlidwasplacedandconnectedtothepowersource.Thepowersourcewasadjustedtodeliveracurrentof3mApergeltube,andthesampleswereelectrophoresedat500Vfor60minutes.Whentheelectrophoresiswascomplete,thepowerwasturnedoff,thechamberlidwasremoved,andtheelectrolytebufferintheupperchamberwasdiscarded.Then,thegeltubewasplacedintherackofthescannerforanalysis.

*MassARRAYSNPdetection*

AMassARRAYiPLEGoldmultiplegenotypinganalysissystemwasprovidedbyAgenaBioscience(AgenaBioscience,Inc.),andreagentsincludedAgenaPCRreagent,AgenaSAPreagent,andAgenaiPLEreagent.Forthedetectionprocess,DNAwasetractedfromperipheralbloodcellsedimentfollowingthemanufacturer’sprotocol(TIANGEN,No:DP348).ViatheAgenaPCRreagentsetandstartPCRprocedures,PCRmitureswereobtained,andthemituresweretreatedwithshrimpalkalinephosphatase(SAP).Afterthefinaletension,thesamplesweresubjectedtodesalinationandthenweredispensedonchipsandanalyzedbytheMALDI-TOFMSsystem.

TheMassARRAYprimerswereasfollows:

*SLCO1B1*(rs4149056,521T>C)

F:ACGTTGGATGAATCTGGGTCATACATGTGG

R:ACGTTGGATGCCAATGGTACTATGGGAGTC

UEP:AAGCATATTACCCATGAAC

*CYP2C19*2*(rs4244285,c.681G>A)

F:ACGTTGGATGGCAATAATTTTCCCACTATC

R:ACGTTGGATGCACTTTCCATAAAAGCAAGG

UEP:CCACTATCATTGATTATTTCCC

*CYP2C19*3*(rs4986893,c.636G>A)

F:ACGTTGGATGAACATCAGGATTGTAAGCAC

R:ACGTTGGATGCTGTAAGTGGTTTCTCAGG

UEP:TTGGCCTTACCTGGAT

**Cohort information**

**Table S1 LDC detection result of our cohort.**

| **Patients** | **Class** | **LDL-1** | **LDL-2** | **LDL-3** | **LDL-4** | **LDL-5** | **LDL-6** | **LDL-7** | **LDL-C** | **sdLDL-C** |
| --- | --- | --- | --- | --- | --- | --- | --- | --- | --- | --- |
| 1737948_0 | Prior | 59 | 48 | 19 | 5 | 1 | 0 | 0 | 132 | 25 |
| 1737948_1 | Post | 18 | 20 | 8 | 2 | 0 | 0 | 0 | 48 | 10 |
| 2068544_0 | Prior | 12 | 20 | 22 | 18 | 4 | 0 | 0 | 76 | 44 |
| 2068544_1 | Post | 14 | 20 | 15 | 8 | 1 | 0 | 0 | 58 | 24 |
| 2013981_0 | Prior | 20 | 38 | 20 | 7 | 2 | 0 | 0 | 87 | 29 |
| 2013981_1 | Post | 18 | 25 | 14 | 5 | 0 | 0 | 0 | 62 | 19 |
| 1613224_0 | Prior | 6 | 17 | 26 | 4 | 0 | 0 | 0 | 53 | 30 |
| 1613224_1 | Post | 7 | 34 | 19 | 3 | 1 | 0 | 0 | 64 | 23 |
| 1764109_0 | Prior | 16 | 25 | 27 | 30 | 19 | 4 | 0 | 121 | 80 |
| 1764109_1 | Post | 13 | 18 | 20 | 20 | 12 | 0 | 0 | 83 | 52 |
| 1609407_0 | Prior | 63 | 44 | 9 | 2 | 1 | 0 | 0 | 119 | 12 |
| 1609407_1 | Post | 23 | 41 | 12 | 3 | 0 | 0 | 0 | 79 | 15 |
| 1569735_0 | Prior | 32 | 20 | 5 | 2 | 0 | 0 | 0 | 59 | 7 |
| 1569735_1 | Post | 20 | 22 | 10 | 4 | 2 | 0 | 0 | 58 | 16 |
| 1668101_0 | Prior | 50 | 20 | 2 | 0 | 0 | 0 | 0 | 72 | 2 |
| 1668101_1 | Post | 42 | 19 | 5 | 2 | 0 | 0 | 0 | 68 | 7 |
| 1611019_0 | Prior | 23 | 36 | 28 | 14 | 3 | 0 | 0 | 104 | 45 |
| 1611019_1 | Post | 27 | 32 | 13 | 3 | 1 | 0 | 0 | 76 | 17 |
| 1760672_0 | Prior | 18 | 27 | 18 | 11 | 4 | 1 | 0 | 79 | 34 |
| 1760672_1 | Post | 17 | 28 | 18 | 6 | 0 | 0 | 0 | 69 | 24 |
| 1611248_0 | Prior | 36 | 33 | 8 | 2 | 0 | 0 | 0 | 79 | 10 |
| 1611248_1 | Post | 34 | 27 | 5 | 0 | 0 | 0 | 0 | 66 | 5 |
| 1740918_0 | Prior | 19 | 33 | 16 | 5 | 0 | 0 | 0 | 73 | 21 |
| 1740918_1 | Post | 20 | 18 | 6 | 2 | 0 | 0 | 0 | 46 | 8 |
| 1380390_0 | Prior | 15 | 13 | 13 | 15 | 3 | 0 | 0 | 59 | 31 |
| 1380390_1 | Post | 19 | 16 | 9 | 6 | 3 | 0 | 0 | 53 | 18 |
| 1760823_0 | Prior | 31 | 36 | 18 | 5 | 1 | 0 | 0 | 91 | 24 |
| 1760823_1 | Post | 18 | 31 | 20 | 7 | 0 | 0 | 0 | 76 | 27 |
| 1753022_0 | Prior | 21 | 23 | 23 | 22 | 10 | 1 | 0 | 100 | 56 |
| 1753022_1 | Post | 24 | 26 | 22 | 15 | 2 | 0 | 0 | 89 | 39 |
| 1569859_0 | Prior | 11 | 13 | 12 | 13 | 6 | 2 | 0 | 57 | 33 |
| 1569859_1 | Post | 17 | 17 | 10 | 3 | 0 | 0 | 0 | 47 | 13 |
| 1380439_0 | Prior | 16 | 28 | 17 | 5 | 0 | 0 | 0 | 66 | 22 |
| 1380439_1 | Post | 9 | 13 | 11 | 7 | 1 | 0 | 0 | 41 | 19 |
| 1607043_0 | Prior | 32 | 12 | 4 | 2 | 2 | 1 | 0 | 53 | 9 |
| 1607043_1 | Post | 24 | 24 | 8 | 3 | 0 | 0 | 0 | 59 | 11 |
| 1917506_0 | Prior | 36 | 27 | 15 | 5 | 2 | 0 | 0 | 85 | 22 |
| 1917506_1 | Post | 22 | 22 | 11 | 4 | 2 | 0 | 0 | 61 | 17 |
| 1737678_0 | Prior | 39 | 55 | 36 | 12 | 3 | 1 | 0 | 146 | 52 |
| 1737678_1 | Post | 26 | 40 | 26 | 8 | 2 | 0 | 0 | 102 | 36 |
| 1942913_0 | Prior | 29 | 28 | 16 | 9 | 3 | 0 | 0 | 85 | 28 |
| 1942913_1 | Post | 22 | 28 | 16 | 8 | 3 | 0 | 0 | 77 | 27 |
| 2129821_0 | Prior | 22 | 14 | 5 | 6 | 2 | 2 | 2 | 53 | 17 |
| 2129821_1 | Post | 19 | 16 | 6 | 6 | 5 | 1 | 0 | 53 | 18 |
| 1973871_0 | Prior | 62 | 60 | 18 | 6 | 2 | 0 | 0 | 148 | 26 |
| 1973871_1 | Post | 17 | 22 | 17 | 13 | 5 | 0 | 0 | 74 | 35 |
| 1735793_0 | Prior | 36 | 29 | 10 | 2 | 1 | 0 | 0 | 78 | 13 |
| 1735793_1 | Post | 14 | 21 | 15 | 6 | 2 | 0 | 0 | 58 | 23 |
| 1796273_0 | Prior | 65 | 40 | 8 | 2 | 0 | 0 | 0 | 115 | 10 |
| 1796273_1 | Post | 35 | 50 | 16 | 5 | 2 | 0 | 0 | 108 | 23 |
| 1781017_0 | Prior | 44 | 45 | 26 | 8 | 1 | 0 | 0 | 124 | 35 |
| 1781017_1 | Post | 56 | 45 | 9 | 1 | 0 | 0 | 0 | 111 | 10 |
| 1386163_0 | Prior | 12 | 30 | 29 | 13 | 4 | 0 | 0 | 88 | 46 |
| 1386163_1 | Post | 14 | 30 | 21 | 9 | 0 | 0 | 0 | 74 | 30 |
| 1738849_0 | Prior | 6 | 15 | 15 | 7 | 2 | 0 | 0 | 45 | 24 |
| 1738849_1 | Post | 6 | 11 | 10 | 5 | 2 | 0 | 0 | 34 | 17 |
| 1616074_0 | Prior | 3 | 3 | 4 | 5 | 4 | 4 | 28 | 51 | 45 |
| 1616074_1 | Post | 8 | 16 | 14 | 8 | 3 | 0 | 0 | 49 | 25 |
| 2129675_0 | Prior | 39 | 18 | 6 | 5 | 3 | 3 | 2 | 76 | 19 |
| 2129675_1 | Post | 45 | 26 | 3 | 0 | 0 | 0 | 0 | 74 | 3 |
| 2030208_0 | Prior | 26 | 42 | 36 | 19 | 5 | 0 | 0 | 128 | 60 |
| 2030208_1 | Post | 13 | 33 | 29 | 10 | 2 | 0 | 0 | 87 | 41 |
| 1613075_0 | Prior | 8 | 20 | 12 | 3 | 2 | 1 | 0 | 46 | 18 |
| 1613075_1 | Post | 8 | 16 | 12 | 5 | 2 | 1 | 0 | 44 | 20 |
| 2032140_0 | Prior | 23 | 26 | 25 | 27 | 14 | 2 | 0 | 117 | 68 |
| 2032140_1 | Post | 16 | 17 | 17 | 18 | 7 | 0 | 0 | 75 | 42 |
| 1709431_0 | Prior | 41 | 42 | 11 | 3 | 1 | 0 | 0 | 98 | 15 |
| 1709431_1 | Post | 35 | 28 | 10 | 3 | 1 | 0 | 0 | 77 | 14 |
| 1735896_0 | Prior | 41 | 39 | 23 | 7 | 1 | 0 | 0 | 111 | 31 |
| 1735896_1 | Post | 42 | 36 | 20 | 5 | 0 | 0 | 0 | 103 | 25 |
| 2067908_0 | Prior | 36 | 42 | 16 | 4 | 0 | 0 | 0 | 98 | 20 |
| 2067908_1 | Post | 13 | 35 | 20 | 8 | 2 | 0 | 0 | 78 | 30 |
| 1569730_0 | Prior | 28 | 34 | 24 | 9 | 2 | 0 | 0 | 97 | 35 |
| 1569730_1 | Post | 56 | 36 | 9 | 0 | 0 | 0 | 0 | 101 | 9 |
| 1697226_0 | Prior | 21 | 26 | 23 | 15 | 6 | 1 | 0 | 92 | 45 |
| 1697226_1 | Post | 8 | 12 | 12 | 12 | 9 | 3 | 0 | 56 | 36 |
| 2122061_0 | Prior | 44 | 32 | 9 | 3 | 0 | 0 | 0 | 88 | 12 |
| 2122061_1 | Post | 40 | 20 | 3 | 0 | 0 | 0 | 0 | 63 | 3 |
| 1698183_0 | Prior | 40 | 40 | 13 | 4 | 2 | 0 | 0 | 99 | 19 |
| 1698183_1 | Post | 37 | 41 | 17 | 5 | 2 | 0 | 0 | 102 | 24 |
| 1787212_0 | Prior | 15 | 21 | 22 | 20 | 10 | 2 | 0 | 90 | 54 |
| 1787212_1 | Post | 13 | 24 | 11 | 3 | 0 | 0 | 0 | 51 | 14 |
| 2069159_0 | Prior | 52 | 50 | 12 | 2 | 0 | 0 | 0 | 116 | 14 |
| 2069159_1 | Post | 27 | 33 | 15 | 5 | 1 | 0 | 0 | 81 | 21 |
| 1903004_0 | Prior | 15 | 17 | 12 | 7 | 1 | 0 | 0 | 52 | 20 |
| 1903004_1 | Post | 10 | 9 | 9 | 15 | 16 | 3 | 0 | 62 | 43 |
| 1735596_0 | Prior | 42 | 41 | 13 | 2 | 0 | 0 | 0 | 98 | 15 |
| 1735596_1 | Post | 10 | 21 | 15 | 5 | 2 | 0 | 0 | 53 | 22 |
| 1972400_0 | Prior | 29 | 31 | 14 | 4 | 0 | 0 | 0 | 78 | 18 |
| 1972400_1 | Post | 20 | 16 | 7 | 3 | 0 | 0 | 0 | 46 | 10 |
| 1443560_0 | Prior | 20 | 24 | 26 | 23 | 7 | 0 | 0 | 100 | 56 |
| 1443560_1 | Post | 17 | 22 | 17 | 12 | 4 | 0 | 0 | 72 | 33 |
| 2127334_0 | Prior | 46 | 47 | 14 | 2 | 0 | 0 | 0 | 109 | 16 |
| 2127334_1 | Post | 17 | 17 | 7 | 3 | 2 | 0 | 0 | 46 | 12 |
| 1817345_0 | Prior | 29 | 42 | 14 | 3 | 0 | 0 | 0 | 88 | 17 |
| 1817345_1 | Post | 14 | 18 | 12 | 6 | 2 | 0 | 0 | 52 | 20 |
| 1900741_0 | Prior | 38 | 21 | 4 | 0 | 0 | 0 | 0 | 63 | 4 |
| 1900741_1 | Post | 24 | 15 | 3 | 0 | 0 | 0 | 0 | 42 | 3 |
| 1612839_0 | Prior | 13 | 16 | 11 | 6 | 2 | 0 | 0 | 48 | 19 |
| 1612839_1 | Post | 15 | 18 | 14 | 9 | 3 | 0 | 0 | 59 | 26 |
| 1285567_0 | Prior | 40 | 51 | 39 | 17 | 4 | 0 | 0 | 151 | 60 |
| 1285567_1 | Post | 24 | 34 | 17 | 6 | 2 | 0 | 0 | 83 | 25 |
| 2019770_0 | Prior | 34 | 45 | 16 | 5 | 2 | 0 | 0 | 102 | 23 |
| 2019770_1 | Post | 20 | 33 | 29 | 16 | 5 | 1 | 0 | 104 | 51 |
| 1769808_0 | Prior | 15 | 16 | 15 | 15 | 5 | 0 | 0 | 66 | 35 |
| 1769808_1 | Post | 15 | 21 | 22 | 13 | 3 | 0 | 0 | 74 | 38 |
| 1482289_0 | Prior | 22 | 35 | 29 | 16 | 4 | 0 | 0 | 106 | 49 |
| 1482289_1 | Post | 20 | 24 | 11 | 3 | 0 | 0 | 0 | 58 | 14 |
| 2019441_0 | Prior | 21 | 34 | 25 | 11 | 2 | 0 | 0 | 93 | 38 |
| 2019441_1 | Post | 26 | 29 | 17 | 6 | 1 | 0 | 0 | 79 | 24 |
| 1974059_0 | Prior | 18 | 31 | 30 | 17 | 5 | 1 | 0 | 102 | 53 |
| 1974059_1 | Post | 14 | 25 | 22 | 11 | 2 | 0 | 0 | 74 | 35 |
| 2032307_0 | Prior | 27 | 39 | 18 | 2 | 0 | 0 | 0 | 86 | 20 |
| 2032307_1 | Post | 16 | 26 | 20 | 9 | 0 | 0 | 0 | 71 | 29 |
| 1445085_0 | Prior | 16 | 20 | 7 | 1 | 0 | 0 | 0 | 44 | 8 |
| 1445085_1 | Post | 9 | 13 | 5 | 1 | 0 | 0 | 0 | 28 | 6 |
| 1769807_0 | Prior | 14 | 18 | 17 | 12 | 5 | 0 | 0 | 66 | 34 |
| 1769807_1 | Post | 12 | 23 | 24 | 12 | 3 | 0 | 0 | 74 | 39 |
| 1603272_0 | Prior | 17 | 29 | 14 | 4 | 1 | 0 | 0 | 65 | 19 |
| 1603272_1 | Post | 21 | 31 | 13 | 2 | 0 | 0 | 0 | 67 | 15 |
| 1619816_0 | Prior | 17 | 29 | 15 | 7 | 3 | 0 | 0 | 71 | 25 |
| 1619816_1 | Post | 13 | 23 | 11 | 3 | 2 | 0 | 0 | 52 | 16 |
| 1794682_0 | Prior | 30 | 41 | 26 | 10 | 1 | 0 | 0 | 108 | 37 |
| 1794682_1 | Post | 19 | 35 | 31 | 17 | 4 | 0 | 0 | 106 | 52 |
| 1616240_0 | Prior | 43 | 40 | 12 | 3 | 0 | 0 | 0 | 98 | 15 |
| 1616240_1 | Post | 26 | 31 | 17 | 8 | 2 | 0 | 0 | 84 | 27 |
| 2207719_0 | Prior | 28 | 30 | 10 | 2 | 0 | 0 | 0 | 70 | 12 |
| 2207719_1 | Post | 25 | 24 | 7 | 2 | 0 | 0 | 0 | 58 | 9 |
| 1752987_0 | Prior | 43 | 41 | 19 | 5 | 1 | 0 | 0 | 109 | 25 |
| 1752987_1 | Post | 23 | 30 | 26 | 20 | 7 | 2 | 0 | 108 | 55 |
| 2127402_0 | Prior | 20 | 30 | 27 | 16 | 2 | 0 | 0 | 95 | 45 |
| 2127402_1 | Post | 13 | 17 | 13 | 7 | 1 | 0 | 0 | 51 | 21 |
| 2014914_0 | Prior | 36 | 33 | 8 | 2 | 0 | 0 | 0 | 79 | 10 |
| 2014914_1 | Post | 20 | 8 | 2 | 1 | 0 | 0 | 0 | 31 | 3 |
| 1601069_0 | Prior | 11 | 11 | 10 | 11 | 11 | 5 | 4 | 63 | 41 |
| 1601069_1 | Post | 8 | 7 | 7 | 8 | 8 | 4 | 2 | 44 | 29 |
| 1743959_0 | Prior | 11 | 15 | 10 | 4 | 2 | 1 | 0 | 43 | 17 |
| 1743959_1 | Post | 19 | 22 | 15 | 7 | 2 | 0 | 0 | 65 | 24 |
| 1755245_0 | Prior | 29 | 37 | 28 | 10 | 0 | 0 | 0 | 104 | 38 |
| 1755245_1 | Post | 20 | 28 | 19 | 5 | 0 | 0 | 0 | 72 | 24 |
| 1697679_0 | Prior | 28 | 34 | 28 | 22 | 6 | 0 | 0 | 118 | 56 |
| 1697679_1 | Post | 16 | 22 | 22 | 23 | 18 | 6 | 0 | 107 | 69 |
| 2012736_0 | Prior | 10 | 16 | 22 | 21 | 7 | 0 | 0 | 76 | 50 |
| 2012736_1 | Post | 10 | 18 | 13 | 5 | 0 | 0 | 0 | 46 | 18 |
| 2129547_0 | Prior | 18 | 25 | 20 | 16 | 5 | 0 | 0 | 84 | 41 |
| 2129547_1 | Post | 12 | 18 | 18 | 15 | 5 | 0 | 0 | 68 | 38 |
| 1755122_0 | Prior | 14 | 26 | 27 | 24 | 9 | 0 | 0 | 100 | 60 |
| 1755122_1 | Post | 9 | 27 | 27 | 16 | 4 | 0 | 0 | 83 | 47 |
| 2007514_0 | Prior | 23 | 36 | 33 | 27 | 4 | 2 | 0 | 125 | 66 |
| 2007514_1 | Post | 20 | 28 | 27 | 24 | 10 | 1 | 0 | 110 | 62 |
| 1569613_0 | Prior | 66 | 90 | 62 | 14 | 0 | 0 | 0 | 232 | 76 |
| 1569613_1 | Post | 48 | 23 | 5 | 1 | 0 | 0 | 0 | 77 | 6 |
| 2145857_0 | Prior | 32 | 42 | 11 | 3 | 0 | 0 | 0 | 88 | 14 |
| 2145857_1 | Post | 9 | 11 | 24 | 8 | 0 | 0 | 0 | 52 | 32 |
| 2127262_0 | Prior | 24 | 26 | 22 | 15 | 2 | 0 | 0 | 89 | 39 |
| 2127262_1 | Post | 25 | 13 | 3 | 0 | 0 | 0 | 0 | 41 | 3 |
| 1901907_0 | Prior | 60 | 27 | 8 | 2 | 0 | 0 | 0 | 97 | 10 |
| 1901907_1 | Post | 30 | 21 | 9 | 3 | 2 | 0 | 0 | 65 | 14 |
| 2030823_0 | Prior | 60 | 35 | 8 | 2 | 0 | 0 | 0 | 105 | 10 |
| 2030823_1 | Post | 44 | 26 | 7 | 1 | 0 | 0 | 0 | 78 | 8 |
| 1903723_0 | Prior | 30 | 45 | 35 | 16 | 3 | 0 | 0 | 129 | 54 |
| 1903723_1 | Post | 37 | 50 | 26 | 7 | 0 | 0 | 0 | 120 | 33 |
| 1557612_0 | Prior | 20 | 19 | 17 | 14 | 7 | 1 | 0 | 78 | 39 |
| 1557612_1 | Post | 19 | 26 | 13 | 4 | 0 | 0 | 0 | 62 | 17 |
| 1763253_0 | Prior | 17 | 27 | 9 | 0 | 0 | 0 | 0 | 53 | 9 |
| 1763253_1 | Post | 23 | 26 | 8 | 1 | 0 | 0 | 0 | 58 | 9 |
| 1707476_0 | Prior | 16 | 25 | 9 | 3 | 1 | 0 | 0 | 54 | 13 |
| 1707476_1 | Post | 18 | 26 | 14 | 6 | 2 | 0 | 0 | 66 | 22 |
| 2031037_0 | Prior | 28 | 47 | 28 | 9 | 2 | 0 | 0 | 114 | 39 |
| 2031037_1 | Post | 16 | 33 | 18 | 5 | 1 | 0 | 0 | 73 | 24 |
| 1754925_0 | Prior | 36 | 43 | 44 | 28 | 2 | 0 | 0 | 153 | 74 |
| 1754925_1 | Post | 23 | 34 | 35 | 30 | 8 | 0 | 0 | 130 | 73 |
| 2123821_0 | Prior | 36 | 39 | 13 | 3 | 0 | 0 | 0 | 91 | 16 |
| 2123821_1 | Post | 32 | 28 | 9 | 3 | 0 | 0 | 0 | 72 | 14 |
| 2069118_0 | Prior | 36 | 94 | 25 | 7 | 2 | 0 | 0 | 164 | 34 |
| 2069118_1 | Post | 23 | 36 | 18 | 5 | 0 | 0 | 0 | 82 | 23 |
| 2014280_0 | Prior | 25 | 34 | 36 | 35 | 8 | 0 | 0 | 138 | 79 |
| 2014280_1 | Post | 12 | 21 | 18 | 14 | 7 | 0 | 0 | 72 | 39 |
| 1619735_0 | Prior | 34 | 31 | 14 | 5 | 1 | 0 | 0 | 85 | 20 |
| 1619735_1 | Post | 7 | 29 | 24 | 7 | 2 | 0 | 0 | 69 | 33 |
| 1763130_0 | Prior | 66 | 47 | 10 | 1 | 0 | 0 | 0 | 124 | 11 |
| 1763130_1 | Post | 26 | 27 | 11 | 3 | 1 | 0 | 0 | 68 | 15 |
| 2015064_0 | Prior | 23 | 20 | 8 | 0 | 0 | 0 | 0 | 51 | 8 |
| 2015064_1 | Post | 22 | 21 | 10 | 3 | 0 | 0 | 0 | 56 | 13 |
| 1754931_0 | Prior | 36 | 39 | 11 | 0 | 0 | 0 | 0 | 86 | 11 |
| 1754931_1 | Post | 5 | 19 | 6 | 0 | 0 | 0 | 0 | 30 | 6 |
| 1738386_0 | Prior | 11 | 14 | 8 | 3 | 1 | 0 | 0 | 37 | 12 |
| 1738386_1 | Post | 18 | 14 | 4 | 0 | 0 | 0 | 0 | 36 | 4 |
| 2067765_0 | Prior | 41 | 49 | 38 | 20 | 5 | 1 | 0 | 154 | 64 |
| 2067765_1 | Post | 26 | 28 | 12 | 3 | 0 | 0 | 0 | 69 | 15 |
| 1817275_0 | Prior | 11 | 11 | 10 | 11 | 6 | 2 | 0 | 51 | 29 |
| 1817275_1 | Post | 7 | 10 | 9 | 8 | 4 | 1 | 0 | 39 | 22 |
| 2003312_0 | Prior | 84 | 66 | 16 | 3 | 0 | 0 | 0 | 169 | 19 |
| 2003312_1 | Post | 14 | 20 | 17 | 12 | 3 | 0 | 0 | 66 | 32 |
| 1901167_0 | Prior | 29 | 36 | 23 | 8 | 2 | 0 | 0 | 98 | 33 |
| 1901167_1 | Post | 20 | 24 | 22 | 11 | 3 | 0 | 0 | 80 | 36 |
| 1819908_0 | Prior | 17 | 19 | 16 | 13 | 3 | 0 | 0 | 68 | 32 |
| 1819908_1 | Post | 9 | 11 | 12 | 11 | 4 | 0 | 0 | 47 | 27 |
| 1837396_0 | Prior | 72 | 74 | 30 | 8 | 2 | 0 | 0 | 186 | 40 |
| 1837396_1 | Post | 32 | 35 | 21 | 9 | 1 | 0 | 0 | 98 | 31 |
| 2019732_0 | Prior | 45 | 38 | 11 | 2 | 0 | 0 | 0 | 96 | 13 |
| 2019732_1 | Post | 17 | 23 | 26 | 22 | 7 | 0 | 0 | 95 | 55 |
| 2019667_0 | Prior | 15 | 19 | 18 | 14 | 6 | 1 | 0 | 73 | 39 |
| 2019667_1 | Post | 9 | 11 | 13 | 15 | 9 | 2 | 0 | 59 | 39 |
| 1905685_0 | Prior | 25 | 30 | 25 | 17 | 4 | 0 | 0 | 101 | 46 |
| 1905685_1 | Post | 21 | 22 | 10 | 3 | 2 | 0 | 0 | 58 | 15 |
| 1613055_0 | Prior | 17 | 24 | 15 | 8 | 3 | 1 | 0 | 68 | 27 |
| 1613055_1 | Post | 24 | 25 | 13 | 4 | 1 | 0 | 0 | 67 | 18 |
| 1538422_0 | Prior | 12 | 21 | 6 | 1 | 0 | 0 | 0 | 40 | 7 |
| 1538422_1 | Post | 11 | 16 | 5 | 1 | 1 | 0 | 0 | 34 | 7 |
| 1443715_0 | Prior | 27 | 37 | 28 | 15 | 3 | 0 | 0 | 110 | 46 |
| 1443715_1 | Post | 22 | 36 | 28 | 13 | 2 | 0 | 0 | 101 | 43 |
| 1641080_0 | Prior | 27 | 29 | 17 | 8 | 0 | 0 | 0 | 81 | 25 |
| 1641080_1 | Post | 20 | 23 | 14 | 6 | 1 | 0 | 0 | 64 | 21 |
| 1907595_0 | Prior | 15 | 22 | 22 | 13 | 2 | 0 | 0 | 74 | 37 |
| 1907595_1 | Post | 7 | 10 | 13 | 17 | 18 | 6 | 0 | 71 | 54 |
| 2129699_0 | Prior | 23 | 35 | 29 | 15 | 3 | 0 | 0 | 105 | 47 |
| 2129699_1 | Post | 20 | 25 | 15 | 5 | 0 | 0 | 0 | 65 | 20 |
| 1755040_0 | Prior | 75 | 57 | 19 | 4 | 0 | 0 | 0 | 155 | 23 |
| 1755040_1 | Post | 34 | 45 | 33 | 14 | 0 | 0 | 0 | 126 | 47 |
| 1754883_0 | Prior | 35 | 37 | 18 | 6 | 0 | 0 | 0 | 96 | 24 |
| 1754883_1 | Post | 50 | 37 | 9 | 0 | 0 | 0 | 0 | 96 | 9 |
| 1284170_0 | Prior | 43 | 25 | 8 | 3 | 2 | 0 | 0 | 81 | 13 |
| 1284170_1 | Post | 37 | 25 | 9 | 4 | 3 | 0 | 0 | 78 | 16 |
| 1460806_0 | Prior | 20 | 6 | 0 | 0 | 0 | 0 | 0 | 26 | 0 |
| 1460806_1 | Post | 15 | 12 | 3 | 0 | 0 | 0 | 0 | 30 | 3 |
| 1760108_0 | Prior | 32 | 32 | 15 | 0 | 0 | 0 | 0 | 79 | 15 |
| 1760108_1 | Post | 14 | 20 | 16 | 10 | 3 | 0 | 0 | 63 | 29 |
| 1840332_0 | Prior | 28 | 33 | 32 | 23 | 6 | 1 | 0 | 123 | 62 |
| 1840332_1 | Post | 24 | 30 | 23 | 11 | 2 | 0 | 0 | 90 | 36 |
| 1615505_0 | Prior | 26 | 38 | 36 | 24 | 5 | 0 | 0 | 129 | 65 |
| 1615505_1 | Post | 12 | 19 | 20 | 20 | 4 | 0 | 0 | 75 | 44 |
| 2068735_0 | Prior | 31 | 44 | 30 | 13 | 2 | 0 | 0 | 120 | 45 |
| 2068735_1 | Post | 38 | 46 | 45 | 36 | 12 | 0 | 0 | 177 | 93 |
| 1492273_0 | Prior | 19 | 19 | 7 | 2 | 0 | 0 | 0 | 47 | 9 |
| 1492273_1 | Post | 7 | 13 | 16 | 8 | 2 | 0 | 0 | 46 | 26 |
| 1619594_0 | Prior | 60 | 44 | 11 | 2 | 0 | 0 | 0 | 117 | 13 |
| 1619594_1 | Post | 43 | 53 | 13 | 3 | 0 | 0 | 0 | 112 | 16 |
| 1817753_0 | Prior | 41 | 45 | 19 | 6 | 2 | 0 | 0 | 113 | 27 |
| 1817753_1 | Post | 23 | 34 | 14 | 3 | 0 | 0 | 0 | 74 | 17 |
| 1655176_0 | Prior | 15 | 25 | 20 | 11 | 4 | 0 | 0 | 75 | 35 |
| 1655176_1 | Post | 9 | 17 | 12 | 6 | 2 | 0 | 0 | 46 | 20 |
| 1742247_0 | Prior | 28 | 36 | 21 | 8 | 3 | 1 | 1 | 98 | 34 |
| 1742247_1 | Post | 23 | 31 | 13 | 3 | 0 | 0 | 0 | 70 | 16 |
| 1933187_0 | Prior | 28 | 36 | 28 | 18 | 4 | 0 | 0 | 114 | 50 |
| 1933187_1 | Post | 24 | 31 | 20 | 10 | 2 | 0 | 0 | 87 | 32 |
| 1693501_0 | Prior | 30 | 33 | 12 | 3 | 0 | 0 | 0 | 78 | 15 |
| 1693501_1 | Post | 17 | 23 | 14 | 4 | 1 | 0 | 0 | 59 | 19 |
| 1697706_0 | Prior | 24 | 48 | 33 | 16 | 3 | 0 | 0 | 124 | 52 |
| 1697706_1 | Post | 16 | 27 | 16 | 7 | 2 | 0 | 0 | 68 | 25 |
| 2001102_0 | Prior | 31 | 41 | 14 | 4 | 0 | 0 | 0 | 90 | 18 |
| 2001102_1 | Post | 30 | 25 | 9 | 4 | 1 | 0 | 0 | 69 | 14 |
| 1765270_0 | Prior | 24 | 28 | 18 | 5 | 1 | 0 | 0 | 76 | 24 |
| 1765270_1 | Post | 19 | 28 | 13 | 6 | 4 | 2 | 0 | 72 | 25 |
| 1753234_0 | Prior | 48 | 51 | 21 | 6 | 2 | 1 | 0 | 129 | 30 |
| 1753234_1 | Post | 37 | 26 | 7 | 1 | 0 | 0 | 0 | 71 | 8 |
| 1973933_0 | Prior | 9 | 21 | 31 | 18 | 1 | 0 | 0 | 80 | 50 |
| 1973933_1 | Post | 13 | 25 | 26 | 16 | 1 | 0 | 0 | 81 | 43 |
| 1838224_0 | Prior | 52 | 45 | 16 | 4 | 2 | 0 | 0 | 119 | 22 |
| 1838224_1 | Post | 42 | 25 | 6 | 2 | 0 | 0 | 0 | 75 | 8 |
| 1433628_0 | Prior | 27 | 45 | 45 | 20 | 2 | 0 | 0 | 139 | 67 |
| 1433628_1 | Post | 41 | 53 | 23 | 4 | 0 | 0 | 0 | 121 | 27 |
| 2033290_0 | Prior | 23 | 22 | 8 | 2 | 0 | 0 | 0 | 55 | 10 |
| 2033290_1 | Post | 23 | 16 | 5 | 2 | 3 | 0 | 0 | 49 | 10 |
| 2122063_0 | Prior | 14 | 16 | 16 | 18 | 22 | 26 | 14 | 126 | 96 |
| 2122063_1 | Post | 17 | 17 | 14 | 20 | 26 | 15 | 7 | 116 | 82 |
| 2129691_0 | Prior | 26 | 23 | 10 | 3 | 1 | 0 | 0 | 63 | 14 |
| 2129691_1 | Post | 35 | 24 | 6 | 1 | 0 | 0 | 0 | 66 | 7 |
| 1569874_0 | Prior | 30 | 25 | 10 | 3 | 0 | 0 | 0 | 68 | 13 |
| 1569874_1 | Post | 30 | 35 | 18 | 5 | 0 | 0 | 0 | 88 | 23 |
| 1443493_0 | Prior | 29 | 35 | 20 | 6 | 0 | 0 | 0 | 90 | 26 |
| 1443493_1 | Post | 22 | 28 | 18 | 8 | 1 | 0 | 0 | 77 | 27 |
| 1917324_0 | Prior | 38 | 42 | 36 | 31 | 13 | 0 | 0 | 160 | 80 |
| 1917324_1 | Post | 25 | 27 | 13 | 3 | 0 | 0 | 0 | 68 | 16 |
| 1749407_0 | Prior | 33 | 47 | 43 | 32 | 9 | 0 | 0 | 164 | 84 |
| 1749407_1 | Post | 32 | 44 | 30 | 15 | 3 | 0 | 0 | 124 | 48 |
| 1793299_0 | Prior | 37 | 44 | 37 | 22 | 3 | 0 | 0 | 143 | 62 |
| 1793299_1 | Post | 19 | 24 | 23 | 28 | 20 | 3 | 0 | 117 | 74 |
| 1139266_0 | Prior | 13 | 16 | 20 | 23 | 20 | 9 | 2 | 103 | 74 |
| 1139266_1 | Post | 5 | 17 | 18 | 7 | 3 | 0 | 0 | 50 | 28 |
| 1837521_0 | Prior | 17 | 17 | 36 | 28 | 11 | 2 | 0 | 111 | 77 |
| 1837521_1 | Post | 50 | 44 | 8 | 4 | 0 |  |  | 106 | 12 |
| 1942099_0 | Prior | 8 | 18 | 19 | 9 | 2 | 0 | 0 | 56 | 30 |
| 1942099_1 | Post | 12 | 29 | 15 | 4 | 1 | 0 | 0 | 61 | 20 |
| 1461248_0 | Prior | 24 | 27 | 15 | 5 | 1 | 0 | 0 | 72 | 21 |
| 1461248_1 | Post | 10 | 15 | 14 | 8 | 3 | 0 | 0 | 50 | 25 |
| 2019730_0 | Prior | 9 | 26 | 22 | 9 | 3 | 0 | 0 | 69 | 34 |
| 2019730_1 | Post | 30 | 30 | 9 | 3 | 0 | 0 | 0 | 72 | 12 |
| 1763130_0 | Prior | 17 | 23 | 14 | 4 | 0 | 0 | 0 | 58 | 18 |
| 1763130_1 | Post | 13 | 24 | 13 | 4 | 0 | 0 | 0 | 54 | 17 |
| 1755409_0 | Prior | 37 | 35 | 17 | 4 | 0 | 0 | 0 | 93 | 21 |
| 1755409_1 | Post | 33 | 22 | 5 | 1 | 0 | 0 | 0 | 61 | 6 |
| 1742706_0 | Prior | 43 | 35 | 12 | 4 | 1 | 0 | 0 | 95 | 17 |
| 1742706_1 | Post | 12 | 24 | 25 | 10 | 5 | 1 | 0 | 77 | 41 |
| 1786635_0 | Prior | 19 | 25 | 17 | 10 | 2 | 0 | 0 | 73 | 29 |
| 1786635_1 | Post | 12 | 30 | 16 | 5 | 0 | 0 | 0 | 63 | 21 |
| 2013986_0 | Prior | 15 | 14 | 5 | 0 | 0 | 0 | 0 | 34 | 5 |
| 2013986_1 | Post | 11 | 12 | 4 | 1 | 0 | 0 | 0 | 28 | 5 |
| 1698683_0 | Prior | 19 | 31 | 35 | 28 | 8 | 0 | 0 | 121 | 71 |
| 1698683_1 | Post | 35 | 40 | 17 | 3 | 0 | 0 | 0 | 95 | 20 |
| 2127510_0 | Prior | 12 | 16 | 15 | 18 | 9 | 0 | 0 | 70 | 42 |
| 2127510_1 | Post | 9 | 12 | 10 | 10 | 5 | 0 | 0 | 46 | 25 |
| 1610644_0 | Prior | 31 | 21 | 3 | 0 | 0 | 0 | 0 | 55 | 3 |
| 1610644_1 | Post | 22 | 22 | 8 | 2 | 0 | 0 | 0 | 54 | 10 |
| 1743948_0 | Prior | 18 | 32 | 13 | 0 | 0 | 0 | 0 | 63 | 13 |
| 1743948_1 | Post | 23 | 24 | 6 | 1 | 0 | 0 | 0 | 54 | 7 |
| 1429179_0 | Prior | 31 | 35 | 31 | 32 | 20 | 2 | 0 | 151 | 85 |
| 1429179_1 | Post | 33 | 36 | 29 | 14 | 3 | 0 | 0 | 115 | 46 |
| 1995923_0 | Prior | 37 | 25 | 9 | 3 | 1 | 0 | 0 | 75 | 13 |
| 1995923_1 | Post | 33 | 23 | 7 | 3 | 0 | 0 | 0 | 66 | 10 |
| 1902175_0 | Prior | 24 | 17 | 5 | 1 | 0 | 0 | 0 | 47 | 6 |
| 1902175_1 | Post | 23 | 17 | 5 | 0 | 0 | 0 | 0 | 45 | 5 |
| 1611310_0 | Prior | 60 | 55 | 19 | 5 | 0 | 0 | 0 | 139 | 24 |
| 1611310_1 | Post | 15 | 18 | 14 | 11 | 3 | 0 | 0 | 61 | 28 |
| 1812055_0 | Prior | 10 | 12 | 10 | 5 | 2 | 0 | 0 | 39 | 17 |
| 1812055_1 | Post | 16 | 28 | 19 | 6 | 2 | 0 | 0 | 71 | 27 |
| 1817383_0 | Prior | 17 | 52 | 14 | 3 | 0 | 0 | 0 | 86 | 17 |
| 1817383_1 | Post | 23 | 34 | 106 | 6 | 1 | 0 | 0 | 170 | 113 |
| 2032189_0 | Prior | 5 | 8 | 22 | 12 | 4 | 1 | 0 | 52 | 39 |
| 2032189_1 | Post | 23 | 58 | 52 | 22 | 63 | 2 | 0 | 220 | 139 |
| 1755088_0 | Prior | 20 | 7 | 0 | 0 | 0 | 0 | 0 | 27 | 0 |
| 1755088_1 | Post | 15 | 23 | 13 | 4 | 0 | 0 | 0 | 55 | 17 |
| 1755088_0 | Prior | 66 | 44 | 7 | 1 | 0 | 0 | 0 | 118 | 8 |
| 1755088_1 | Post | 49 | 56 | 20 | 4 | 0 | 0 | 0 | 129 | 24 |
| 1763505_0 | Prior | 34 | 34 | 14 | 4 | 1 | 0 | 0 | 87 | 19 |
| 1763505_1 | Post | 33 | 38 | 13 | 4 | 2 | 0 | 0 | 90 | 19 |
| 1763505_0 | Prior | 10 | 12 | 11 | 8 | 3 | 0 | 0 | 44 | 22 |
| 1763505_1 | Post | 10 | 18 | 19 | 10 | 2 | 0 | 0 | 59 | 31 |
| 1763505_0 | Prior | 24 | 28 | 9 | 1 | 0 | 0 | 0 | 62 | 10 |
| 1763505_1 | Post | 18 | 24 | 8 | 2 | 0 | 0 | 0 | 62 | 10 |
| 1763592_0 | Prior | 32 | 15 | 3 | 1 | 0 | 0 | 0 | 51 | 4 |
| 1763592_1 | Post | 37 | 27 | 9 | 3 | 2 | 0 | 0 | 78 | 14 |
| 1763592_0 | Prior | 24 | 25 | 10 | 3 | 0 | 0 | 0 | 62 | 13 |
| 1763592_1 | Post | 22 | 31 | 19 | 8 | 3 | 0 | 0 | 83 | 30 |
| 2019691_0 | Prior | 14 | 18 | 16 | 16 | 8 | 2 | 0 | 74 | 42 |
| 2019691_1 | Post | 6 | 9 | 11 | 10 | 8 | 3 | 0 | 47 | 32 |
| 2019691_0 | Prior | 9 | 8 | 8 | 8 | 9 | 6 | 3 | 51 | 34 |
| 2019691_1 | Post | 6 | 9 | 9 | 7 | 6 | 3 | 0 | 10 | 25 |
| 2030740_0 | Prior | 27 | 58 | 45 | 21 | 6 | 1 | 0 | 158 | 73 |
| 2030740_1 | Post | 31 | 36 | 15 | 5 | 2 | 0 | 0 | 89 | 22 |
| 2015301_0 | Prior | 28 | 22 | 9 | 2 | 0 | 0 | 0 | 61 | 11 |
| 2015301_1 | Post | 21 | 22 | 9 | 0 | 0 | 0 | 0 | 52 | 9 |
| 2127416_0 | Prior | 21 | 27 | 18 | 10 | 2 | 0 | 0 | 78 | 30 |
| 2127416_1 | Post | 23 | 26 | 13 | 4 | 0 | 0 | 0 | 66 | 17 |
| 1938063_0 | Prior | 21 | 30 | 17 | 8 | 3 | 1 | 0 | 80 | 29 |
| 1938063_1 | Post | 25 | 28 | 13 | 5 | 3 | 1 | 0 | 75 | 22 |
| 1938063_0 | Prior | 21 | 27 | 27 | 29 | 20 | 4 | 0 | 128 | 80 |
| 1938063_1 | Post | 26 | 28 | 16 | 6 | 0 | 0 | 0 | 76 | 22 |
| 1933178_0 | Prior | 19 | 25 | 19 | 16 | 8 | 0 | 0 | 87 | 43 |
| 1933178_1 | Post | 11 | 15 | 13 | 13 | 9 | 4 | 2 | 67 | 41 |
| 1933178_0 | Prior | 29 | 29 | 16 | 6 | 0 | 0 | 0 | 80 | 22 |
| 1933178_1 | Post | 24 | 21 | 11 | 5 | 2 | 0 | 0 | 63 | 18 |
| 1755180_0 | Prior | 20 | 25 | 17 | 7 | 3 | 0 | 0 | 72 | 27 |
| 1755180_1 | Post | 13 | 20 | 18 | 9 | 4 | 2 | 1 | 67 | 34 |
| 1817614_0 | Prior | 63 | 25 | 5 | 1 | 0 | 0 | 0 | 94 | 6 |
| 1817614_1 | Post | 44 | 24 | 6 | 2 | 0 | 0 | 0 | 76 | 8 |
| 1603841_0 | Prior | 12 | 27 | 31 | 24 | 5 | 0 | 0 | 99 | 60 |
| 1603841_1 | Post | 24 | 28 | 21 | 12 | 3 | 0 | 0 | 88 | 36 |
| 1817669_0 | Prior | 32 | 39 | 30 | 19 | 5 | 0 | 0 | 125 | 54 |
| 1817669_1 | Post | 27 | 33 | 25 | 13 | 3 | 0 | 0 | 101 | 41 |
| 1619605_0 | Prior | 19 | 27 | 20 | 11 | 2 | 0 | 0 | 79 | 33 |
| 1619605_1 | Post | 14 | 20 | 18 | 13 | 3 | 0 | 0 | 68 | 34 |
| 1619605_2 | Post | 17 | 18 | 12 | 4 | 0 | 0 | 0 | 51 | 16 |
| 1764133_0 | Prior | 9 | 16 | 20 | 21 | 10 | 2 | 0 | 78 | 53 |
| 1764133_1 | Post | 16 | 17 | 15 | 12 | 7 | 2 | 0 | 69 | 36 |
| 1764133_2 | Post | 4 | 5 | 6 | 6 | 6 | 3 | 0 | 30 | 21 |
| 2129455_0 | Prior | 12 | 18 | 17 | 10 | 0 | 0 | 0 | 57 | 27 |
| 2129455_1 | Post | 13 | 17 | 14 | 8 | 1 | 0 | 0 | 53 | 23 |
| 2129455_2 | Post | 9 | 12 | 14 | 12 | 2 | 0 | 0 | 49 | 28 |
| 2129630_0 | Prior | 31 | 28 | 8 | 2 | 0 | 0 | 0 | 69 | 10 |
| 2129630_1 | Post | 31 | 24 | 10 | 6 | 3 | 2 | 2 | 78 | 23 |
| 2129630_2 | Post | 12 | 14 | 8 | 1 | 0 | 2 | 2 | 39 | 13 |
| 1907589_0 | Prior | 27 | 26 | 11 | 3 | 0 | 0 | 0 | 67 | 14 |
| 1907589_1 | Post | 18 | 20 | 9 | 3 | 0 | 0 | 0 | 50 | 12 |
| 1907589_2 | Post | 21 | 20 | 10 | 4 | 0 | 0 | 0 | 55 | 14 |
| 1752767_0 | Prior | 28 | 21 | 7 | 2 | 0 | 0 | 0 | 58 | 9 |
| 1752767_1 | Post | 50 | 32 | 9 | 3 | 1 | 0 | 0 | 95 | 13 |
| 1752767_2 | Post | 6 | 6 | 8 | 12 | 16 | 4 | 0 | 52 | 40 |
| 2030469_0 | Prior | 22 | 33 | 7 | 2 | 0 | 0 | 0 | 64 | 9 |
| 2030469_1 | Post | 17 | 14 | 5 | 1 | 0 | 0 | 0 | 37 | 6 |
| 2030469_2 | Post | 23 | 15 | 3 | 0 | 0 | 0 | 0 | 41 | 3 |
| 1698762_0 | Prior | 61 | 77 | 35 | 9 | 3 | 0 | 0 | 185 | 47 |
| 1698762_1 | Post | 61 | 55 | 11 | 2 | 0 | 0 | 0 | 129 | 13 |
| 1698762_2 | Post | 19 | 45 | 31 | 14 | 6 | 2 | 0 | 117 | 53 |
| 1433628_0 | Prior | 26 | 31 | 19 | 10 | 2 | 0 | 0 | 88 | 31 |
| 1433628_1 | Post | 25 | 23 | 12 | 4 | 2 | 0 | 0 | 66 | 18 |
| 1433628_2 | Post | 17 | 20 | 9 | 2 | 0 | 0 | 0 | 48 | 11 |
| 1735937_0 | Prior | 9 | 17 | 10 | 3 | 3 | 0 | 0 | 42 | 16 |
| 1735937_1 | Post | 14 | 12 | 4 | 2 | 1 | 0 | 0 | 33 | 7 |
| 1735937_2 | Post | 29 | 13 | 0 | 0 | 0 | 0 | 0 | 42 | 0 |
| 2031445_0 | Prior | 31 | 26 | 8 | 2 | 0 | 0 | 0 | 67 | 10 |
| 2031445_1 | Post | 6 | 19 | 17 | 9 | 5 | 2 | 0 | 58 | 33 |
| 2031445_2 | Post | 10 | 21 | 11 | 4 | 0 | 0 | 0 | 46 | 15 |
| 1916432_0 | Prior | 18 | 24 | 23 | 18 | 6 | 1 | 0 | 90 | 48 |
| 1916432_1 | Post | 15 | 18 | 11 | 5 | 0 | 0 | 0 | 49 | 16 |
| 1916432_2 | Post | 19 | 22 | 14 | 7 | 2 | 0 | 0 | 64 | 23 |
| 2030961_0 | Prior | 54 | 39 | 13 | 4 | 0 | 0 | 0 | 110 | 17 |
| 2030961_1 | Post | 32 | 28 | 10 | 3 | 0 | 0 | 0 | 73 | 13 |
| 2030961_2 | Post | 35 | 27 | 7 | 0 | 0 | 0 | 0 | 69 | 7 |
| 1839760_0 | Prior | 21 | 30 | 30 | 27 | 7 | 0 | 0 | 115 | 64 |
| 1839760_1 | Post | 18 | 26 | 25 | 17 | 4 | 0 | 0 | 90 | 46 |
| 1839760_2 | Post | 16 | 18 | 17 | 20 | 16 | 3 | 0 | 90 | 56 |
| 1667022_0 | Prior | 46 | 40 | 12 | 2 | 0 | 0 | 0 | 100 | 14 |
| 1667022_1 | Post | 28 | 35 | 21 | 8 | 1 | 0 | 0 | 93 | 30 |
| 1667022_2 | Post | 10 | 23 | 19 | 13 | 4 | 0 | 0 | 69 | 36 |
| 1885209_0 | Prior | 25 | 34 | 21 | 8 | 2 | 0 | 0 | 90 | 31 |
| 1885209_1 | Post | 18 | 18 | 9 | 5 | 4 | 2 | 0 | 56 | 20 |
| 1885209_2 | Post | 17 | 19 | 11 | 5 | 4 | 2 | 0 | 58 | 22 |
| 1817669_0 | Prior | 18 | 30 | 21 | 11 | 1 | 0 | 0 | 81 | 33 |
| 1817669_1 | Post | 30 | 27 | 1 | 3 | 0 | 0 | 0 | 61 | 4 |
| 1817669_2 | Post | 30 | 27 | 10 | 3 | 0 | 0 | 0 | 10 | 13 |
| 1667479_0 | Prior | 9 | 11 | 7 | 3 | 0 | 0 | 0 | 30 | 10 |
| 1667479_1 | Post | 8 | 9 | 9 | 8 | 5 | 1 | 0 | 40 | 23 |
| 1667479_2 | Post | 11 | 14 | 10 | 4 | 1 | 0 | 0 | 40 | 15 |
| 2005259_0 | Prior | 30 | 57 | 31 | 6 | 0 | 0 | 0 | 124 | 37 |
| 2005259_1 | Post | 54 | 35 | 7 | 2 | 0 | 0 | 0 | 98 | 9 |
| 2005259_2 | Post | 42 | 14 | 2 | 0 | 0 | 0 | 0 | 58 | 2 |
| 1752987_0 | Prior | 25 | 33 | 16 | 4 | 0 | 0 | 0 | 78 | 20 |
| 1752987_1 | Post | 14 | 22 | 9 | 2 | 0 | 0 | 0 | 47 | 11 |
| 1752987_2 | Post | 8 | 23 | 14 | 3 | 0 | 0 | 0 | 48 | 17 |
| 1974508_0 | Prior | 16 | 34 | 16 | 3 | 0 | 0 | 0 | 69 | 19 |
| 1974508_1 | Post | 36 | 23 | 2 | 0 | 0 | 0 | 0 | 61 | 2 |
| 1974508_2 | Post | 14 | 20 | 9 | 1 | 0 | 0 | 0 | 44 | 10 |
| 1974508_3 | Post | 14 | 27 | 15 | 1 | 0 | 0 | 0 | 57 | 16 |
| 2089018_0 | Prior | 47 | 49 | 22 | 4 | 0 | 0 | 0 | 122 | 26 |
| 2089018_1 | Post | 40 | 40 | 24 | 8 | 2 | 0 | 0 | 114 | 34 |
| 2089018_2 | Post | 18 | 33 | 19 | 6 | 2 | 0 | 0 | 78 | 27 |
| 2089018_3 | Post | 24 | 25 | 9 | 4 | 3 | 2 | 2 | 69 | 20 |
| 2127282_0 | Prior | 26 | 48 | 15 | 2 | 0 | 0 | 0 | 91 | 17 |
| 2127282_1 | Post | 18 | 31 | 19 | 7 | 3 | 0 | 0 | 78 | 29 |
| 2127282_2 | Post | 37 | 23 | 6 | 3 | 0 | 0 | 0 | 69 | 9 |
| 2127282_3 | Post | 24 | 28 | 16 | 6 | 2 | 0 | 0 | 76 | 24 |
| 1703760_0 | Prior | 24 | 28 | 18 | 8 | 3 | 1 | 3 | 85 | 33 |
| 1703760_1 | Post | 25 | 26 | 10 | 3 | 1 | 0 | 0 | 65 | 14 |
| 1703760_2 | Post | 14 | 18 | 12 | 5 | 0 | 0 | 0 | 49 | 17 |
| 1703760_3 | Post | 19 | 25 | 14 | 4 | 0 | 0 | 0 | 62 | 18 |
| 1737517_0 | Prior | 14 | 31 | 17 | 4 | 1 | 0 | 0 | 67 | 22 |
| 1737517_1 | Post | 20 | 28 | 12 | 4 | 2 | 0 | 0 | 66 | 18 |
| 1737517_2 | Post | 34 | 28 | 9 | 2 | 0 | 0 | 0 | 73 | 11 |
| 1737517_3 | Post | 44 | 29 | 10 | 3 | 0 | 0 | 0 | 86 | 13 |
| 1191784_0 | Prior | 36 | 39 | 27 | 12 | 2 | 1 | 0 | 117 | 42 |
| 1191784_1 | Post | 24 | 15 | 4 | 1 | 0 | 0 | 0 | 44 | 5 |
| 1191784_2 | Post | 18 | 13 | 3 | 1 | 0 | 0 | 0 | 35 | 4 |
| 1191784_3 | Post | 16 | 18 | 7 | 1 | 0 | 0 | 0 | 42 | 8 |
| 2143535_0 | Prior | 26 | 38 | 13 | 2 | 0 | 0 | 0 | 79 | 15 |
| 2143535_1 | Post | 12 | 16 | 8 | 3 | 0 | 0 | 0 | 39 | 11 |
| 2143535_2 | Post | 14 | 19 | 10 | 3 | 1 | 0 | 0 | 47 | 14 |
| 2143535_3 | Post | 19 | 28 | 16 | 5 | 3 | 0 | 0 | 71 | 24 |
| 1704154_0 | Prior | 39 | 34 | 14 | 4 | 0 | 0 | 0 | 91 | 18 |
| 1704154_1 | Post | 41 | 17 | 4 | 0 | 0 | 0 | 0 | 62 | 4 |
| 1704154_2 | Post | 30 | 23 | 10 | 3 | 0 | 0 | 0 | 66 | 13 |
| 1704154_3 | Post | 15 | 21 | 13 | 6 | 3 | 0 | 0 | 58 | 22 |
| 1671189 | Health | 45 | 32 | 8 | 0 | 0 | 0 | 0 | 8 | 85 |
| 1754820 | Health | 16 | 16 | 10 | 2 | 0 | 0 | 0 | 12 | 44 |
| 1754946 | Health | 32 | 32 | 7 | 0 | 0 | 0 | 0 | 7 | 71 |
| 1754820 | Health | 44 | 27 | 3 | 0 | 0 | 0 | 0 | 3 | 74 |
| 2030242 | Health | 14 | 15 | 6 | 0 | 0 | 0 | 0 | 6 | 35 |
| 2035184 | Health | 48 | 18 | 0 | 0 | 0 | 0 | 0 | 0 | 66 |
| 2012736 | Health | 38 | 22 | 4 | 0 | 0 | 0 | 0 | 4 | 64 |
| 2035184 | Health | 43 | 34 | 8 | 0 | 0 | 0 | 0 | 8 | 85 |
| 1610750 | Health | 18 | 18 | 6 | 0 | 0 | 0 | 0 | 6 | 42 |
| 1764171 | Health | 34 | 25 | 4 | 0 | 0 | 0 | 0 | 4 | 63 |
| 1817275 | Health | 10 | 21 | 8 | 1 | 0 | 0 | 0 | 9 | 40 |
| 1764171 | Health | 46 | 24 | 3 | 0 | 0 | 0 | 0 | 3 | 73 |
| 1380494 | Health | 27 | 23 | 8 | 0 | 0 | 0 | 0 | 8 | 58 |
| 1769559 | Health | 15 | 22 | 10 | 2 | 0 | 0 | 0 | 12 | 49 |
| 1838487 | Health | 31 | 14 | 2 | 0 | 0 | 0 | 0 | 2 | 47 |
| 1704154 | Health | 35 | 24 | 6 | 0 | 0 | 0 | 0 | 6 | 65 |
| 1139262 | Health | 20 | 13 | 3 | 1 | 0 | 0 | 0 | 4 | 37 |
| 2031728 | Health | 18 | 13 | 4 | 0 | 0 | 0 | 0 | 4 | 35 |
| 2031445 | Health | 32 | 28 | 8 | 1 | 0 | 0 | 0 | 9 | 69 |
| 2031728 | Health | 57 | 35 | 6 | 0 | 0 | 0 | 0 | 6 | 98 |

Prior refers to the CHD patients prior-treatment, Post refers to CHD patients post-treatment, Health refer to healthy volunteers.

**References**

1. HoefnerDM,HodelSD,O'BrienJF,BranumEL,SunD,MeissnerI,McConnellJP:**Developmentofarapid,quantitativemethodforLDLsubfractionationwithuseoftheQuantimetriLipoprintLDLSystem**.*Clinicalchemistry*2001,**47**(2):266-274.
